# Supplementary material for: Toxicity Assessment of Mesoporous Silica Nanoparticles upon Intravenous Injection in Mice: Implications for Drug Delivery
Source: MDPI journal article supplement (doi:10.3390/pharmaceutics14050969), 2022-04-30
Supplement: s1 [file s1]

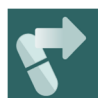

# Supplementary Materials: Toxicity Assessment of Mesoporous Silica Nanoparticles upon Intravenous Injection in Mice: Implications for Drug Delivery

William M. MacCuaig, Abhilash Samykutty, Jeremy Foote, Wenyi Luo, Alexander Filatenkov, Min Li, Courtney Houchen, William E. Grizzle and Lacey R. McNally

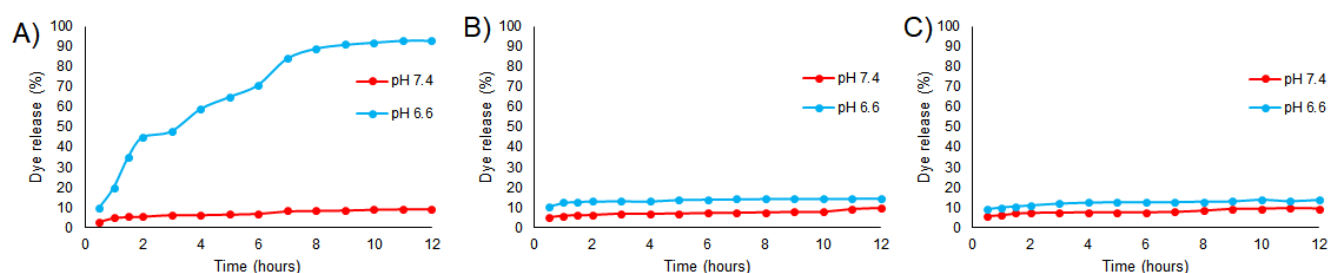

**Figure S1.** Simulation of contrast agent IR780 exfiltration from MSN pores while coated via (A) Chitosan, (B) 2KPEG, or (C) 35KPEG. Treatments were added to 10% phosphate buffered saline at a biological pH level of 7.4 or a hypoxic pH level of 6.6.
